# Supplementary material for: Dietary intervention strategies for ethnic Chinese women with gestational diabetes mellitus: A systematic review and meta‐analysis
Source: PubMed Central journal article supplement — Nutr Diet. 2019 Apr 1;76(2):211–32. doi: 10.1111/1747-0080.12524 (PMC6850048; doi:10.1111/1747-0080.12524), 2019-04-01
Supplement: NDI-76-211-s001.pdf [file NDI-76-211-s001.pdf]

**Supplementary table 1:** Full search strategy for Ovid Medline search

|    |                                                                                                                                                                                                  |
|----|--------------------------------------------------------------------------------------------------------------------------------------------------------------------------------------------------|
| 1  | exp Asia, Southeastern/                                                                                                                                                                          |
| 2  | exp Asia/                                                                                                                                                                                        |
| 3  | exp Asian Continental Ancestry Group/                                                                                                                                                            |
| 4  | exp Ethnic Groups/                                                                                                                                                                               |
| 5  | exp Asian Americans/                                                                                                                                                                             |
| 6  | exp China/ or exp Taiwan/ or exp Hong Kong/ or exp Macau/                                                                                                                                        |
| 7  | exp "Emigrants and Immigrants"/                                                                                                                                                                  |
| 8  | Asia*.mp                                                                                                                                                                                         |
| 9  | Chinese.mp                                                                                                                                                                                       |
| 10 | Mandarin.mp                                                                                                                                                                                      |
| 11 | Cantonese.mp                                                                                                                                                                                     |
| 12 | China.mp                                                                                                                                                                                         |
| 13 | Thai*.mp                                                                                                                                                                                         |
| 14 | Singapore*.mp                                                                                                                                                                                    |
| 15 | Malaysia*.mp                                                                                                                                                                                     |
| 16 | Indonesia*.mp                                                                                                                                                                                    |
| 17 | Taiwan*.mp                                                                                                                                                                                       |
| 18 | Vietnam*.mp                                                                                                                                                                                      |
| 19 | Viet Nam*.mp                                                                                                                                                                                     |
| 20 | Hong Kong*.mp                                                                                                                                                                                    |
| 21 | Hong?Kong*.mp                                                                                                                                                                                    |
| 22 | Macau*.mp or Macao*.mp                                                                                                                                                                           |
| 23 | or/1-22                                                                                                                                                                                          |
| 24 | exp diabetes, gestational/                                                                                                                                                                       |
| 25 | exp pregnancy in diabetics/                                                                                                                                                                      |
| 26 | ((gestation* or pregnan* or matern* or prenatal) adj2 (diabet* or prediabet* or niddm or iddm or glyc* or glucos* or hyperglyc* or insulin* or hyperinsulin* or proinsulin* or blood sugar*)).mp |
| 27 | (gestational and diab*).mp                                                                                                                                                                       |
| 28 | gdm.mp.                                                                                                                                                                                          |
| 29 | gestational diabetes.mp                                                                                                                                                                          |
| 30 | or/24-29                                                                                                                                                                                         |
| 31 | 23 and 30                                                                                                                                                                                        |

**Supplementary table 2:**

Types of comparisons of included studies

|                         | Individualised intervention as comparison group                     | Food exchange education as comparison group                                           |
|-------------------------|---------------------------------------------------------------------|---------------------------------------------------------------------------------------|
| Food exchange education | Chen 2017<br>Ma 2011<br>Zhang 2013<br>Zhang 2015a                   |                                                                                       |
| Low GI diet             | Hu 2014<br>Liu 2015<br>Liu 2018<br>Wang 2016a<br>Wu 2014<br>Wu 2015 | Wang 2016*                                                                            |
| Low GL diet             | Gai 2012<br>Jiang 2016<br>Li 2017<br>Ma 2015<br>Zhang 2015          | Chen 2015<br>Huang 2015<br>Shen 2010<br>Sun 2013<br>Wang 2016*<br>Wu 2013<br>Zhi 2012 |
| Fibre-enriched diet     | Lian 2014<br>Luo 2016<br>Pan 2015<br>Yang 2015<br>Wu 2010           |                                                                                       |
| DASH diet               | Yao 2015                                                            |                                                                                       |
| PUFA rich diet          | Wang 2015                                                           |                                                                                       |

GI: glycaemic index; GL: glycaemic load

Either individualised diet or food exchange education were used in the control group to compare with other diets listed on the left hand side

\*Wang 2016 study compared both low GI diet and low GL diet to food exchange education

**Supplementary table 3:**

a. Summary of risk of bias judgements about each risk of bias item for randomised control trial.

| Name of Randomised control trial | Bias in sequence generation | Bias in allocation concealment | Performance bias | Detection bias | Attrition bias | Reporting bias | Other bias (Compliance) |
|----------------------------------|-----------------------------|--------------------------------|------------------|----------------|----------------|----------------|-------------------------|
| Chen 2015                        | No                          | No                             | ?                | No             | No             | ?              | No                      |
| Chen 2017                        | No                          | ?                              | ?                | No             | No             | ?              | ?                       |
| Gai 2012                         | No                          | ?                              | ?                | No             | No             | ?              | ?                       |
| Hu 2014                          | ?                           | ?                              | No               | No             | ?              | ?              | No                      |
| Huang 2015                       | No                          | ?                              | No               | No             | No             | ?              | No                      |
| Jiang 2016                       | No                          | ?                              | ?                | No             | No             | ?              | ?                       |
| Li 2017                          | No                          | Yes                            | ?                | No             | No             | ?              | ?                       |
| Lian 2014                        | ?                           | ?                              | ?                | No             | No             | ?              | ?                       |
| Liu 2015                         | No                          | No                             | ?                | No             | No             | ?              | No                      |
| Liu 2018                         | No                          | ?                              | ?                | No             | No             | ?              | ?                       |
| Luo 2016                         | No                          | ?                              | ?                | No             | No             | ?              | ?                       |
| Ma 2011                          | No                          | ?                              | ?                | No             | No             | ?              | No                      |
| Ma 2015                          | No                          | Yes                            | No               | No             | No             | ?              | No                      |
| Pan 2015                         | No                          | Yes                            | ?                | No             | Yes            | ?              | No                      |
| Sun 2013                         | No                          | ?                              | ?                | No             | No             | ?              | No                      |
| Wang 2015                        | ?                           | ?                              | ?                | ?              | No             | ?              | No                      |
| Wang 2016                        | No                          | No                             | No               | No             | Yes            | ?              | No                      |
| Wu 2013                          | No                          | ?                              | No               | No             | No             | ?              | No                      |
| Wu 2014                          | No                          | ?                              | Yes              | No             | No             | ?              | No                      |
| Wu 2015                          | No                          | ?                              | ?                | No             | No             | ?              | ?                       |
| Yang 2015                        | No                          | ?                              | ?                | No             | No             | ?              | ?                       |
| Yao 2015                         | No                          | ?                              | ?                | ?              | No             | ?              | No                      |
| Zhang 2015                       | No                          | ?                              | ?                | No             | No             | ?              | ?                       |
| Zhi 2012                         | No                          | No                             | ?                | No             | No             | ?              | No                      |

## b. Summary of risk of bias judgements about each risk of bias item for cohort studies.

| Name of Cohort studies | Bias due to confounding | Bias in selection of participants into the study | Bias in classification of interventions | Bias due to deviations from intended interventions | Bias due to missing data | Bias in measurement of outcomes | Bias in selection of the reported result | Other bias (compliance) | Overall bias |
|------------------------|-------------------------|--------------------------------------------------|-----------------------------------------|----------------------------------------------------|--------------------------|---------------------------------|------------------------------------------|-------------------------|--------------|
| Shen 2010              | Moderate                | Low                                              | Low                                     | Low                                                | Low                      | Low                             | Low                                      | Low                     | Moderate     |
| Wang 2016a             | Moderate                | Moderate                                         | Low                                     | Moderate                                           | Low                      | Low                             | Low                                      | Low                     | Moderate     |
| Wu 2010                | Moderate                | Moderate                                         | Low                                     | Moderate                                           | Unknown                  | Low                             | Low                                      | Unknown                 | Moderate     |
| Zhang 2013             | Moderate                | Low                                              | Low                                     | Critical                                           | Low                      | Low                             | Low                                      | Low                     | Critical     |
| Zhang 2015a            | Moderate                | Low                                              | Low                                     | Critical                                           | Low                      | Low                             | Low                                      | Unknown                 | Critical     |

For Peer Review

**Supplementary table 4:**

a. Quality of evidence using the GRADE approach for outcomes which used individualised dietary intervention in comparison group

| Outcome measure        | Dietary intervention (Study design) | Risk of bias                                                   | Inconsistency                              | Indirectness | Imprecision                       | Publication bias | Reasons to upgrade evidence | Quality of evidence |
|------------------------|-------------------------------------|----------------------------------------------------------------|--------------------------------------------|--------------|-----------------------------------|------------------|-----------------------------|---------------------|
| Fasting plasma glucose | Low GI diet (RCTs)                  | No limitation                                                  | Very serious, I <sup>2</sup> more than 75% | No           | No                                | Unknown          | Not applicable              | Low                 |
|                        | Low GL diet (RCTs)                  | Serious limitation, moderate allocation concealment risk       | Very serious, I <sup>2</sup> more than 75% | No           | No                                | Unknown          | Not applicable              | Very low            |
|                        | Fibre-enriched diet (RCTs)          | No limitation                                                  | Very serious, I <sup>2</sup> more than 75% | No           | No                                | Unknown          | Not applicable              | Low                 |
| 2 hour plasma glucose  | Low GI diet (RCTs)                  | No limitation                                                  | Very serious, I <sup>2</sup> more than 75% | No           | No                                | Unknown          | Not applicable              | Low                 |
|                        | Low GL diet (RCTs)                  | Serious limitation, moderate allocation concealment risk       | Very serious, I <sup>2</sup> more than 75% | No           | No                                | Unknown          | Not applicable              | Very low            |
|                        | Fibre-enriched diet (RCTs)          | No limitation                                                  | Very serious, I <sup>2</sup> more than 75% | No           | No                                | Unknown          | Not applicable              | Low                 |
| HbA1c                  | Low GI diet (RCTs)                  | Serious limitation, moderate performance bias                  | Very serious, I <sup>2</sup> more than 75% | No           | No                                | Unknown          | Not applicable              | Very low            |
|                        | Low GL diet (RCTs)                  | Serious limitation, moderate allocation concealment risk       | Very serious, I <sup>2</sup> more than 75% | No           | No                                | Unknown          | Not applicable              | Very low            |
|                        | Fibre-enriched diet (RCTs)          | No limitation                                                  | Very serious, I <sup>2</sup> more than 75% | No           | No                                | Unknown          | Not applicable              | Low                 |
| Caesarean Section      | Food exchange (Cohort studies)      | Very serious limitation, all cohort studies have critical bias | No                                         | No           | Serious, wide confidence interval | Unknown          | No                          | Very low            |

|                      |                                |                                                                             |                                                          |    |                                                        |         |                                                                              |          |
|----------------------|--------------------------------|-----------------------------------------------------------------------------|----------------------------------------------------------|----|--------------------------------------------------------|---------|------------------------------------------------------------------------------|----------|
|                      | Low GI diet (RCTs)             | Serious limitation, moderate performance bias                               | Serious, I <sup>2</sup> more than 40%                    | No | No                                                     | Unknown | Not applicable                                                               | Low      |
| Macrosomia           | Food exchange (Cohort studies) | Very serious limitation, most are cohort studies with critical bias         | No                                                       | No | No                                                     | Unknown | Large magnitude of effect based on consistent evidence from included studies | Very low |
|                      | Low GI diet (RCTs)             | Serious limitation, moderate performance bias                               | No                                                       | No | No                                                     | Unknown | Not applicable                                                               | Moderate |
|                      | Fibre-enriched diet (RCTs)     | Serious limitation, moderate attrition bias and allocation concealment risk | Serious, I <sup>2</sup> more than 40%                    | No | Serious, wide confidence interval                      | Unknown | Not applicable                                                               | Very low |
| Hypoglycaemia        | Low GI diet (RCTs)             | Serious limitation, moderate performance bias                               | No                                                       | No | No                                                     | Unknown | Not applicable                                                               | Moderate |
| Preterm birth        | Food exchange (Cohort studies) | Very serious limitation, all cohort studies have critical bias              | Very serious, opposite results of the 2 included studies | No | Serious, wide confidence interval                      | Unknown | No                                                                           | Very low |
|                      | Low GI diet (RCTs)             | Serious limitation, moderate performance bias                               | No                                                       | No | No                                                     | Unknown | Not applicable                                                               | Moderate |
|                      | Low GL diet (RCTs)             | Very serious limitation, high allocation concealment risk                   | No                                                       | No | Serious, small sample size across the body of evidence | Unknown | Not applicable                                                               | Very low |
|                      | Fibre-enriched diet (RCTs)     | Serious limitation, moderate attrition bias and allocation concealment risk | No                                                       | No | Serious, insufficient sample sizes                     | Unknown | Not applicable                                                               | Low      |
| Respiratory distress | Low GI diet (RCTs)             | No limitation                                                               | No                                                       | No | No                                                     | Unknown | Not applicable                                                               | High     |

GI: glycaemic index; GL: glycaemic load; RCT: Randomised controlled trial.

b. Quality of evidence using the GRADE approach for outcomes which used food exchange intervention in control group to compare Low GL diet

| Outcome measure (Study design) | Risk of bias                                 | Inconsistency                              | Indirectness | Imprecision                        | Publication bias | Reasons to upgrade evidence | Quality of evidence |
|--------------------------------|----------------------------------------------|--------------------------------------------|--------------|------------------------------------|------------------|-----------------------------|---------------------|
| Fasting plasma glucose (RCTs)  | No limitation                                | Very serious, I <sup>2</sup> more than 75% | No           | No                                 | Undetected       | Not applicable              | Low                 |
| 2 hour plasma glucose (RCTs)   | No limitation                                | Very serious, I <sup>2</sup> more than 75% | No           | No                                 | Undetected       | Not applicable              | Low                 |
| Caesarean section (RCTs)       | Very serious limitation, high attrition bias | No                                         | No           | Serious, small sample sizes        | Undetected       | Not applicable              | Very low            |
| Macrosomia (RCTs)              | Serious limitation, moderate attrition bias  | No                                         | No           | Serious, insufficient sample sizes | Undetected       | Not applicable              | Low                 |
| Hypoglycaemia (RCTs)           | Serious limitation, high attrition bias      | No                                         | No           | Serious, insufficient sample sizes | Undetected       | Not applicable              | Low                 |
| Respiratory distress (RCTs)    | No                                           | Serious, inconsistent findings             | No           | Serious, wide confidence interval  | Undetected       | Not applicable              | Low                 |

RCT: Randomised controlled trial.

For Peer Review
